# Supplementary material for: Implementation of surveillance of invasive mosquitoes in Belgium according to the ECDC guidelines
Source: PubMed Central journal article supplement (PMC4021692; doi:10.1186/1756-3305-7-201), 2014-04-26
Supplement: 1756-3305-7-201-S2.pdf [file 1756-3305-7-201-S2.pdf]

**Site Form**

Site Code  
 Site Name  
 Address  
 Municipality  
 ZIP Code  
 Longitude  
 Latitude  
 Contact person  
 Email  
 Telephone  
 Fax  
 Website  
 Comments

**Breeding Site Form**

Breeding Site Code  
 Subsite Code  
 Site Code  
 Larval Habitat Type  
 Larval Habitat Surface (m<sup>2</sup>)  
 Address  
 Municipality  
 Zip Code  
 Longitude  
 Latitude  
 Comments

**Subsite Form**

Subsite code  
 Site Code  
 Address  
 Municipality  
 Zip Code  
 Longitude  
 Latitude  
 Comments

**Larval Sampling**

Sampling Code  
 Subsite Code  
 Site Code  
 Breeding site Code  
 Larval Habitat Type  
 Sampling Date  
 Water Depth (cm)  
 Presence Mosquitoes  
 Presence exotic Mosq  
 Comments

**Sampling MMLP**

Sampling Code  
 Site Code  
 Trap Code  
 Start Date  
 End Date  
 Presence mosquitoes  
 Presence exotic mosquitoes  
 Comments

**Sampling ovitraps**

Sampling Code  
 Subsite Code  
 Site Code  
 Trap Code  
 Start Date  
 End Date  
 Presence of Aedes eggs  
 Comments

**Identification larval sampling**

Tube number  
 Sampling Code  
 Breeding Site Code  
 Subsite Code  
 Adult/Larva  
 Genus  
 Species  
 Sex  
 Number  
 Box  
 Storage of Box  
 Identifier  
 Date ID  
 Comments

**Identification MMLP**

Tube Number  
 Sampling Code  
 Genus  
 Species  
 Sex  
 Number  
 Box  
 Storage of Box  
 Status  
 Identifier  
 Date ID  
 Comments

**Identification ovitraps**

Tube number  
 Sampling Code  
 Subsite Code  
 Adult/Larva  
 Eclosion Date A/L  
 Genus  
 Species  
 Sex  
 Number  
 Box  
 Storage of Box  
 Identifier  
 Date ID  
 Comments
